# Supplementary material for: Natural cotton fibers as adsorbent for solid-phase extraction of polycyclic aromatic hydrocarbons in water samples
Source: Royal Society of Chemistry journal article supplement (doi:10.1039/c4an00195h), 2014-01-01

**Natural cotton fibers as adsorbents for solid-phase extraction of  
polycyclic aromatic hydrocarbons in water samples**

**Jianping Wang, Shengquan Liu, Chunyan Chen, Ying Zou,**

**Huiping Hu, Qingyun Cai\*, Shouzhuo Yao\***

**Jianping Wang, Chunyan Chen, Ying Zou, Shengquan Liu, Huiping Hu,**

**Qingyun Cai\*, Shouzhuo Yao\***

*State Key Laboratory of Chemo/Biosensing & Chemometrics, College of Chemistry*

*& Chemical Engineering, Hunan University, Changsha 410082, China*

*E-mail: [szyao@hnu.edu.cn](mailto:szyao@hnu.edu.cn); [caigroup@126.com](mailto:caigroup@126.com); Tel: +86-731-88821968*

## Supplementary Materials

### 2. Experimental

#### 2.5 HPLC-FLD analysis

Table S-1 Time program of emission and excitation wavelength of fluorescence detection

| Time<br>(min) | Emission<br>wavelength (nm) | Excitation<br>wavelength (nm) | PAH<br>determined | PAH structure                                                                         |
|---------------|-----------------------------|-------------------------------|-------------------|---------------------------------------------------------------------------------------|
| 0.0-12.0      | 340                         | 260                           | Flu               | 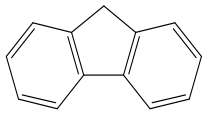   |
| 12.0-15.0     | 370                         | 250                           | Ant               |   |
| 15.0-17.5     | 462                         | 289                           | FlA               |  |
| 17.5-21.0     | 380                         | 320                           | Pyr               |  |
| 21.0-25.0     | 403                         | 266                           | BaA               |  |
| 25.0-32.0     | 430                         | 294                           | BbF               |  |
| 25.0-32.0     | 430                         | 294                           | BkF               |  |

### 3. Results and discussion

#### 3.1.1. Optimization of desorption conditions

Figure. S1 Effect of eluting solvent volume on SPE performance. Extraction conditions: sample volume, 50 mL; extraction time: 60 min; eluent solvent, acetonitrile; ultrasonic desorption time, 10 min.

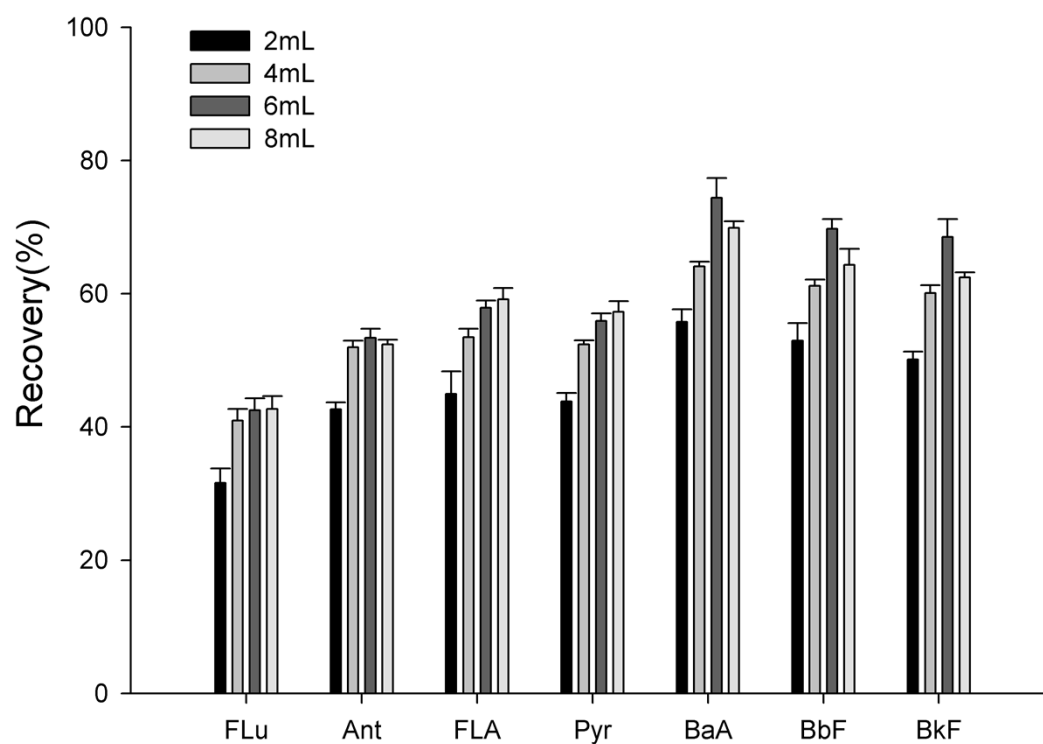

Figure. S2 Effect of ultrasonic desorption time on SPE performance. Extraction conditions: sample volume, 50 mL; extraction time: 60 min; eluent solvent, acetonitrile; volume of elution solvent, 3×2 mL.

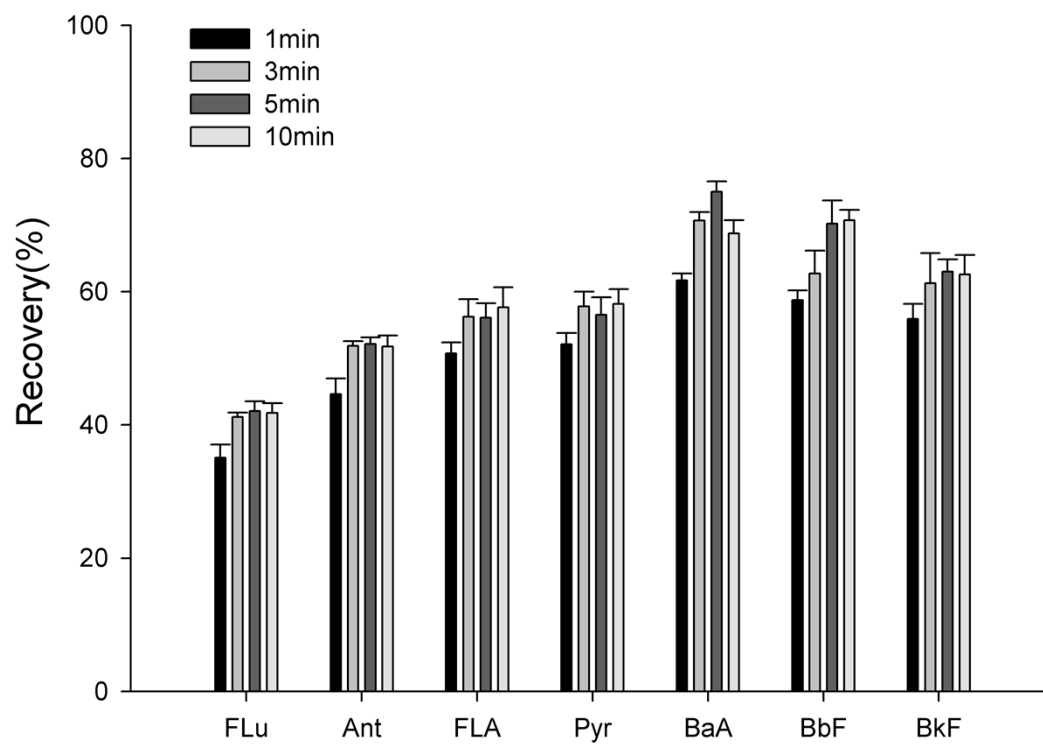

### 3.1.2. Effect of salt concentration and organic modifier

Fig. S3 Effect of salt concentration on SPE performance. Extraction conditions: sample volume, 50 mL; extraction time: 60 min; eluent solvent, acetonitrile; volume of elution solvent, 3×2mL; ultrasonic desorption time, 5min

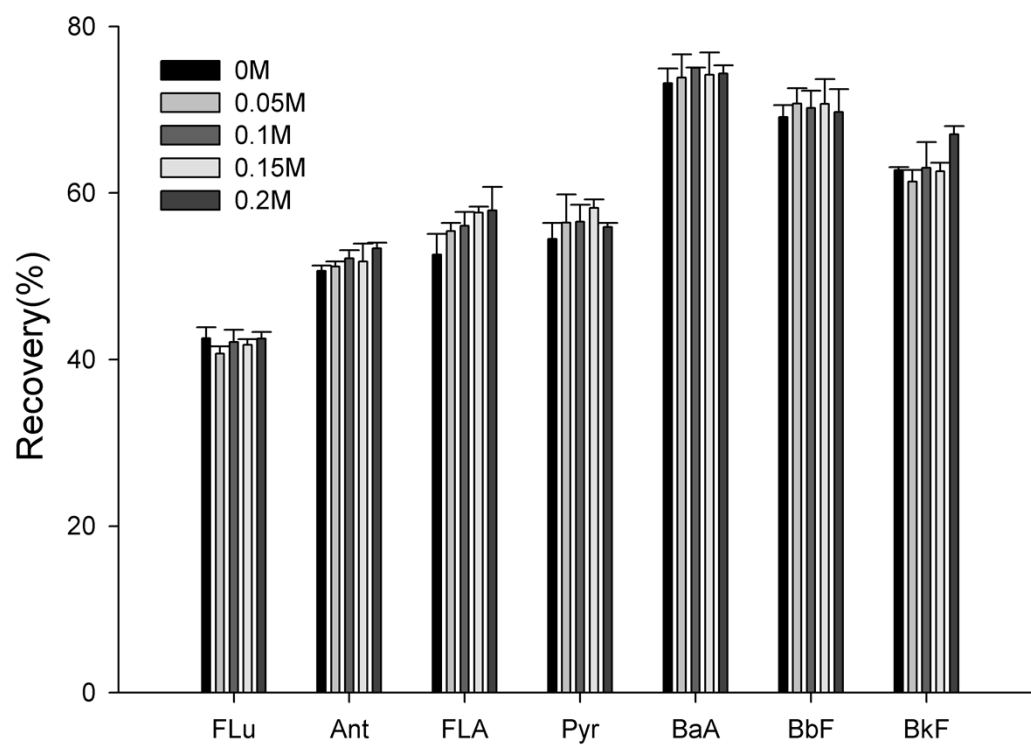

### 3.1.7. Effect of volume of organic modifier.

Fig. S4 Effect of organic modifier volume on SPE performance. Extraction conditions: sample volume, 50 mL; extraction time: 60 min; eluent solvent, acetonitrile; volume of elution solvent, 3×2 mL; ultrasonic desorption time, 5 min.

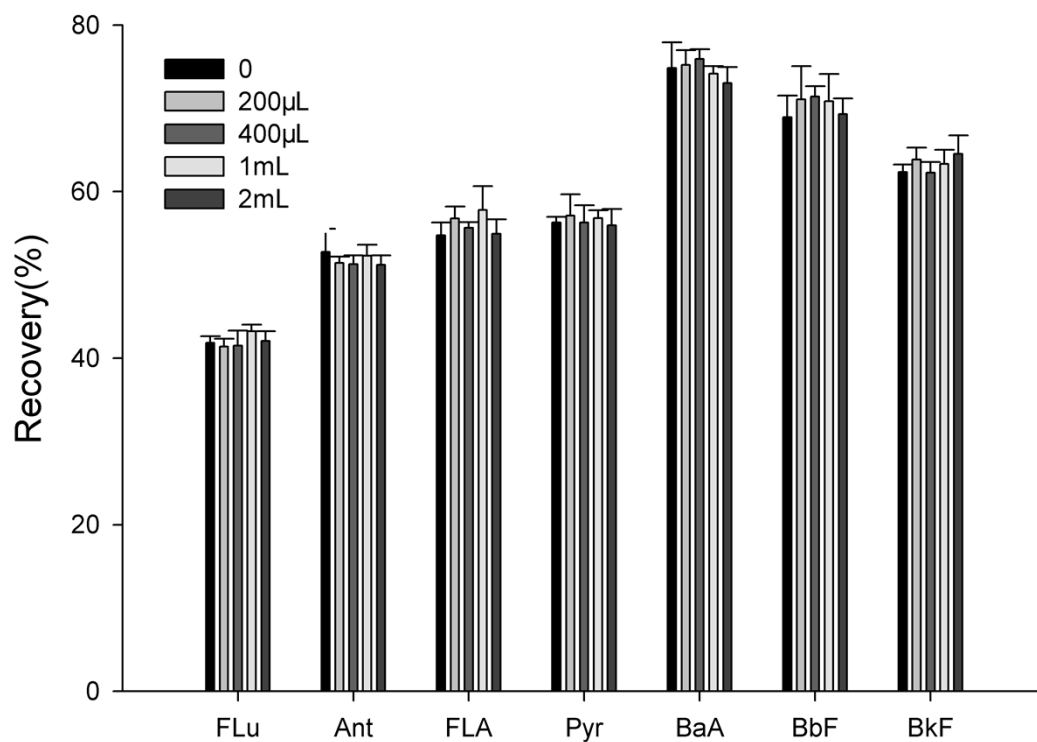

Supplement: c4an00195h1.pdf [file c4an00195h1.pdf]
